1 Interactions between microtubule-driven membrane  
2 protrusions induce filament bundling

3 A. Vahid and T. Idema

4 Keywords: cytoskeletal-membrane interactions, filament bundling.

5

## Abstract

6 The plasma membrane and cytoskeleton of living cells are closely coupled dynamical systems.  
7 Internal cytoskeletal elements such as actin filaments and microtubules continually exert  
8 forces on the membrane, resulting in the formation of membrane protrusions. In this paper  
9 we investigate the interplay between the shape of a cell distorted by pushing and pulling forces  
10 generated by microtubules and the resulting rearrangement of the microtubule network.  
11 From analytical calculations, we find that two microtubules that deform the vesicle can  
12 both attract or repel each other, depending on their angular separations, the size, and the  
13 direction of imposed perturbations. We likewise find the necessary conditions for attractive  
14 interactions between multiple microtubules. Our results suggest that the commonly reported  
15 parallel structures of microtubules in both biological and artificial systems can be a natural  
16 consequence of membrane mediated interactions.

## 17 Introduction

18 Cells are enveloped by a plasma membrane which serves as a selective soft physical bar-  
19 rier as well as being home to many functional proteins. The stability and shape of cellular  
20 membranes are determined not only by inherent properties of the membrane, but also by  
21 interactions with the cell's cytoskeleton (1). The highly dynamic cytoskeletal network is  
22 vital for numerous biological processes, including cell motility, cell migration, and cell sig-  
23 naling (2, 3). A typical feature occurring in such processes is the formation of membrane  
24 protrusions. Protrusions commonly emerge in the form of microvilli, filopodia or lamellipo-  
25 dia (4, 5). These leading-edge protrusions, the existence of which is vital for responding to  
26 external cues, can be driven, controlled and elongated by a complicated crosstalk between  
27 the membrane and underlying filaments.

28 The spatial arrangement of cytoskeletal filaments, force generation mechanisms, and cy-  
29 toskeletal networks coupling to the shape of cells have been investigated extensively, both  
30 theoretically and experimentally (6–10). For example, when growing encapsulated micro-  
31 tubules inside an artificial spherical membrane, it has been shown that the vesicle exhibits  
32 a diverse range of morphologies, from a simple elongated shape to dumbbell-like geometries  
33 (7). The diversity in the shape of such vesicles results from both the elongation dynamics of  
34 the filaments inside them and the material properties of the membrane. Such spatial rear-  
35 rangement of filaments does not occur spontaneously but stems from the conditions imposed  
36 on them from various elements, one of which is the cell shape.

37 In this paper, we investigate the interplay between the shape of vesicles, that are deformed  
38 by internal force generating filaments like microtubules, and the rearrangement of those fil-  
39 aments. In a biological cell, microtubules undergo treadmilling and dynamic instabilities  
40 (catastrophes) which are controlled by associated proteins (11). Only a few of the micro-  
41 tubules that grow inside a cell can reach the cell membrane (12). The pushing and pulling  
42 forces generated by those few microtubules can be harnessed for creating protrusions of the  
43 membrane (13). Membrane mediated interactions between microtubule-induced protrusions  
44 may influence the arrangement of other functional filaments in addition to microtubules  
45 themselves (14, 15). Therefore, it is warranted to study how the presence of a biological  
46 membrane, which has both elastic and fluid properties, alters the interaction between micro-  
47 tubules. This interaction could both drive processes like the formation of filament bundles  
48 or inhibit microtubule aggregation.

49 We use a modified version of the theoretical framework that has been developed for investi-  
50 gating membrane mediated interactions between proteins embedded in or bounded to a fluid  
51 membrane (16, 17). We first explain the model in detail. We then study the effects of all the  
52 possible elements on the interaction between microtubules. In particular, we demonstrate  
53 that changing the in-plane tension in the membrane qualitatively affects the equilibrium  
54 shape that a vesicle can adopt. We further reveal that the size and relative orientation  
55 of the imposed deformations determines the nature of their interactions. Our results thus  
56 elucidate the effective role of the membrane in determining the equilibrium arrangement of  
57 protrusions imposed by the cytoskeleton.

## 58 Model

59 We assume that microtubules (including their tip) are rigid and impose sharp deformations  
60 on the membrane. To analyze the effect of such perturbations on the shape of an undeformed  
61 spherical membrane, we use the conventional Canham-Helfrich bending free energy including  
62 fixed surface area ( $S$ ) and volume ( $V$ ) constraints, given by:

$$63 \quad E_{\text{CH}} = \int dS [2\kappa H^2 + \sigma] + \Delta P \int dV \quad (1)$$

65 with  $H$ ,  $\sigma$  and  $\Delta P$  the sum of the two principal curvatures, surface tension and pressure  
66 difference, respectively. Due to the conservation of topology we can ignore the Gaussian  
67 curvature contribution in the energy functional. Using the spherical analog of the Monge  
68 parametrization, we describe the shape of a deformed vesicle as:

$$69 \quad r(\theta, \phi) = R(1 + u(\theta, \phi)) \quad (2)$$

71 where  $R$  is the radius of an undisturbed vesicle and  $u(\theta, \phi)$  is the deformation field. As  
72 the only constraints present are those imposed by the microtubules, we fix the amount of  
73 induced deformation at their tip (Fig. 1),  $\bar{\mathbf{u}}_0 = (u(\theta_1, \phi_1), \dots, u(\theta_N, \phi_N))$  with  $N$  the number  
74 of microtubules. Mathematically, we apply this condition via Lagrange multipliers,

$$75 \quad E_{\text{MTs}} = \int dS [\mathbf{L} \cdot (\bar{\boldsymbol{\delta}}(\Omega - \Omega_0)u(\theta, \phi))], \text{ where } \bar{\boldsymbol{\delta}}(\Omega - \Omega_0) = \begin{bmatrix} \delta(\Omega - \Omega_1) \\ \vdots \\ \delta(\Omega - \Omega_N) \end{bmatrix} \quad (3)$$

76 where  $\mathbf{L}$  is a vector of Lagrange multipliers and  $\delta(\Omega - \Omega_i) = \delta(\cos(\theta - \theta_i))\delta(\phi - \phi_i)$  is the  
77 Dirac delta function for spherical coordinates. In terms of the deformation field and the  
78 applied constrains, the total energy of the membrane is given by:

$$79 \quad \frac{E_{\text{Total}}}{\kappa} = \int d\Omega \left[ 2 \left( 1 - \nabla^2 u + \frac{1}{4}(\nabla^2 u)^2 + u\nabla^2 u + \frac{1}{2}|\nabla u|^2 \right) \right. \\ \left. + \bar{\sigma} \left( (1 + u)^2 + \frac{1}{2}|\nabla u|^2 \right) - \frac{\overline{\Delta P}}{3}(1 + u)^3 - \mathbf{L} \cdot (\bar{\boldsymbol{\delta}}u) \right], \quad (4)$$

81 where the nondimensionalized surface tension and pressure difference are defined as  $\bar{\sigma} = \frac{R^2\sigma}{\kappa}$   
82 and  $\overline{\Delta P} = \frac{R^3\Delta P}{\kappa}$ , respectively. In the small deformation regime, we can approximate the  
83 relative behavior of the pressure difference and surface tension as that of the Laplace pressure  
84 for a sphere:  $\overline{\Delta P} = 2\bar{\sigma}$ . We then obtain the linearized form of the shape equation by  
85 minimizing Eq. 4, which gives:

$$86 \quad \nabla^2 \nabla^2 u + (2 - \bar{\sigma})\nabla^2 - 2\bar{\sigma}u = \mathbf{L} \cdot \bar{\boldsymbol{\delta}} \quad (5)$$

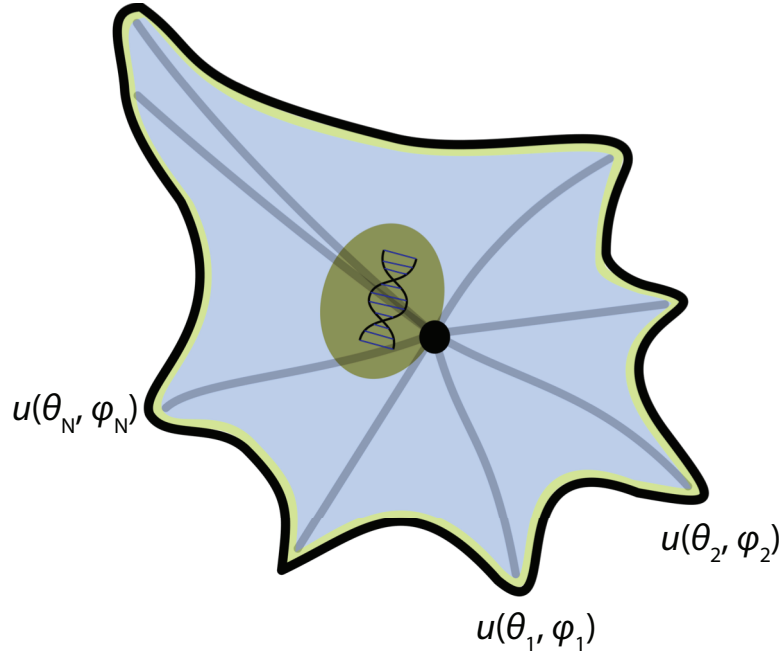

Figure 1: Schematic shape of a cell containing some microtubules. We model the microtubules by the imposed deformation ( $\bar{\mathbf{u}}_0 = (u(\theta_1, \phi_1), \dots, u(\theta_N, \phi_N))$ ) at their tips.

87 Because the resultant equation is linear, the final solution for the deformation field of the  
88 membrane can be constructed as:

$$89 \quad u(\theta, \phi) = \mathbf{L} \cdot \bar{\mathbf{g}}(\Omega - \Omega_0), \text{ where } \bar{\mathbf{g}}(\Omega - \Omega_0) = \begin{bmatrix} G(\Omega - \Omega_1) \\ \cdot \\ \cdot \\ \cdot \\ G(\Omega - \Omega_N) \end{bmatrix}. \quad (6)$$

90 In these equations  $G(\Omega - \Omega_i)$  is the Green's function of the left hand side of Eq. 5. We  
91 expand the Dirac delta function in terms of spherical harmonics<sup>1</sup>, and solve for the Green's  
92 function, which gives:

$$93 \quad G(\theta - \theta', \phi - \phi') = \sum_{l=2}^{\infty} \sum_{m=-l}^l \frac{Y_l^m(\theta, \phi) Y_l^{m*}(\theta', \phi')}{l^2(l+1)^2 - (2 - \bar{\sigma})l(l+1) - 2\bar{\sigma}}. \quad (7)$$

94 In Eq. 7 we have excluded the first two modes. The zeroth mode corresponds to motion  
95 of the center of mass. Excluding the first mode is necessary to prevent inflation of the  
96 vesicle, as we have already penalized any changes in the volume in Eq. 4. Excluding these  
97 modes implies correcting the Dirac delta in Eq. 5, which is reasonable for small deformations.  
98 Finally, taking into account the constraints associated with the microtubules (the vector  $\bar{\mathbf{u}}_0$ ),

<sup>1</sup> $\delta(\phi - \phi')\delta(\cos(\theta - \theta')) = \sum_{l=0}^{\infty} \sum_{m=-l}^l Y_l^m(\theta, \phi) Y_l^{m*}(\theta', \phi')$ , where the symbol “\*” denotes complex conjugate.

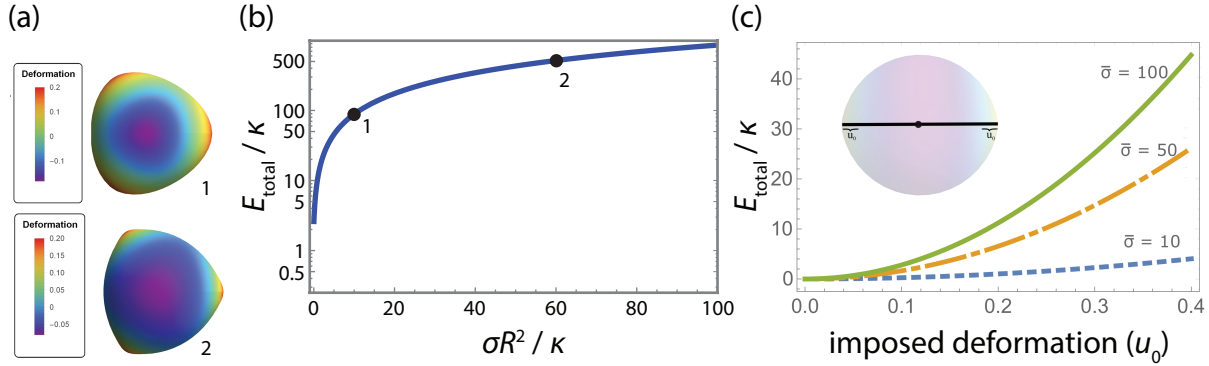

Figure 2: Membrane deformation due to the presence of microtubules. (a) Snapshots of a deformed vesicle for low (1) and high (2) values of the surface tension. The imposed deformation vector reads  $\bar{\mathbf{u}}_0 = (0.1, 0.1, 0.1)$ . (b) Increasing the in-plane tension makes the membrane deformation more spiky, in contrast to low surface tension regimes where we have rounded deformations. Numbers correspond to the images in (a). (c) The deformation energy of a spherical membrane containing two growing microtubules for different values of the surface tension.

99 we obtain the Lagrange multipliers and the induced deformation field as:

$$100 \quad \mathbf{L} = \bar{\mathbf{u}}_0^T \cdot \mathbf{M}^{-1}, \text{ and } u(\theta, \phi) = \bar{\mathbf{u}}_0^T \cdot \mathbf{M}^{-1} \cdot \bar{\mathbf{g}}(\Omega - \Omega_0), \quad (8)$$

101 where  $\mathbf{M}$  is an  $N \times N$  matrix whose components are constructed as  $m_{ij} = G(\theta_i - \theta_j, \phi_i - \phi_j)$ ,  
 102 with  $i = 1, \dots, N$  and  $j = 1, \dots, N$ . For the diagonal components of the matrix  $\mathbf{M}$  (when  
 103  $i = j$ , corresponding to self-interactions), because we have a constant number of lipids and  
 104 the vesicle is closed, we consider a maximum mode  $l = L_{\text{max}}$  in Eq. 7. Substituting the  
 105 derived deformation field  $u(\theta, \phi)$  in Eq. 4, one can get the total energy of the membrane as:

$$106 \quad \frac{E_{\text{Total}}}{\kappa} = \frac{1}{2} \bar{\mathbf{u}}_0^T \cdot \mathbf{M}^{-1} \cdot \bar{\mathbf{u}}_0 + 8\pi \left(1 + \frac{\bar{\sigma}}{3}\right). \quad (9)$$

107 Given an arbitrary number of microtubules, all we need is the amount of deformation they  
 108 impose to investigate their interactions. The only relevant length scale of our system relates  
 109 surface tension to the bending modulus, given by  $\lambda = \sqrt{\kappa/\sigma}$ . In a biological context, the  
 110 pertinent values of  $\lambda$  are in the range of 60 – 100 nm (18, 19). Given this length scale,  
 111 one can obtain the nondimensionalized physiologically relevant values of surface tension as:  
 112  $\bar{\sigma} = (R/\lambda)^2$ . For a value of  $\lambda = 100$  nm, for example, we get  $\bar{\sigma} = 100$  for a vesicle size of  
 113  $R = 1 \mu\text{m}$ .

114 To examine the effect of surface tension on the equilibrium shape of the membrane, we  
 115 position three microtubules inside a vesicle such that they form an equilateral triangle, and  
 116 all impose the same amount of deformation on the membrane ( $u_0 = 0.1$ ). For small values  
 117 of  $\bar{\sigma}$ , we are in a bending dominated regime. The membrane, therefore, minimizes the total  
 118 mean curvature, as illustrated in Fig. 2a. Increasing  $\bar{\sigma}$  alters the local shape of membrane

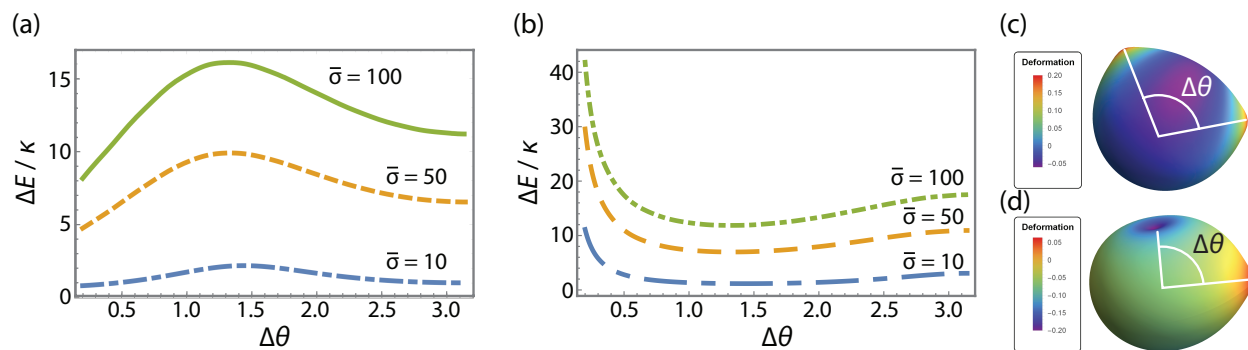

Figure 3: The interaction between microtubule-driven protrusions. (a) Microtubules that deform the membrane identically, attract each other and bundle for separations smaller than a critical angle  $\Delta\theta_c \simeq 5\pi/12$ . The elastic nature of the membrane hinders microtubule coalescence for larger separations. (b) Protrusions of opposite orientation repel each other for small distances and attract for large angular separations. Right panel: Snapshots of two protrusions that are imposed either identically (c) or oppositely (d).

119 at the tip of microtubules from being smoothly curved into sharp spikes with higher total  
 120 energy (Fig. 2b). Next, we analyze the total energy of a vesicle encapsulating two growing  
 121 microtubules that push the membrane in opposite directions (Fig. 2c). We assume that the  
 122 two microtubules distort the membrane similarly. As expected, the more a vesicle elongates,  
 123 the larger the stored energy becomes. Also, membrane vesicles with a high in-plane tension  
 124 require more energy to initiate a protrusion process. Microtubules are dynamic entities and  
 125 constantly switch between growing and shrinking phases that are characterized by rescue  
 126 and catastrophe events (20). Not only are they able to generate a pushing force during  
 127 growing into obstacles like membrane, microtubules can also release a force in the course  
 128 of shrinking, which can be harnessed for pulling purposes (in case of deformable obstacles).  
 129 The pushing forces are in the range of 2 – 3 pN (21), leading to an energy of 40 – 60  $\kappa$   
 130 for a deformation<sup>2</sup> of  $u_0 = 0.1$ . Therefore, having membrane protrusions that cost a total  
 131 energy ( $E_{\text{Total}}$ ) of not more than 60 – 100  $\kappa$  would still allow tubulin dimers to aggregate  
 132 at the end of the microtubules. The depolymerization-dependent forces are about one order  
 133 of magnitude stronger ( $\sim 30 - 65$  pN (22)) than those generated during the growth state.  
 134 Therefore, the force numbers in the biological context are high enough to impose distortions  
 135 of a similar size as we suppose in our calculations – although depending on the length of the  
 136 microtubules, some processes like buckling may decrease the maximum force they exert on  
 137 the membrane.

138 The arrangement of filaments plays a key role in the emergent shape of protrusions and  
 139 consequently in sensing the extracellular environment. To unravel the nature of elastic  
 140 interaction between protrusions, we investigate a vesicle containing two protrusions with  
 141 a varying angular separation between them. For identical deformations, as illustrated in  
 142 Fig. 3, we have both short-range attraction and long-range repulsion regimes, that are

<sup>2</sup>We assume a bending modulus of  $\kappa = 25k_B T$  for the membrane and a vesicle size of 1  $\mu\text{m}$ .

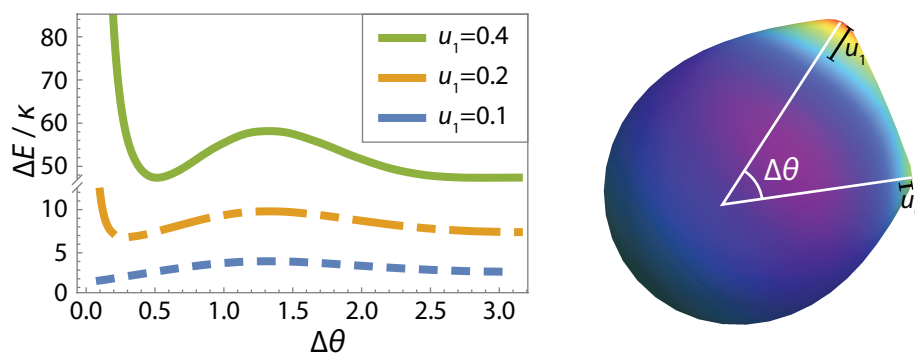

Figure 4: Interaction between microtubule-driven protrusions of different strength. As shown in the graph, introducing a difference in the magnitude of the protrusions results in a very strong short range repulsion between them ( $u_0 = 0.1$ ;  $\bar{\sigma} = 10$ ).

143 connected at a critical angle  $\theta_c = 5\pi/12$ . The plot suggests that cellular membranes facilitate  
 144 the aggregation of microtubules for short separations and hinder their assembly for longer  
 145 distances. Although the global minimum of the energy is when two protrusions are merged,  
 146 there is an energy barrier, the value of which increases with the surface tension. Inversely,  
 147 two oppositely oriented protrusions repel each other for short and attract for larger distances.  
 148 When analyzing the interaction between protrusions of different sizes, we realize that altering  
 149 the magnitude of deformation for one of the microtubules strikingly changes the nature  
 150 of interactions in their small separations. For example, as illustrated in Fig. 4, making  
 151 one of the constraints stronger/weaker than the other turns short range attraction into  
 152 repulsion. This suggests that having such distortions on a vesicle is costly, and that cells  
 153 will therefore try to minimize the amount of deformed material between them by adjusting  
 154 their protrusions. Putting the results of the two previous experiments together, we find that  
 155 when interacting with membranes, microtubules rearrange themselves in such a way to form  
 156 parallel filaments. Such rearrangements are ubiquitous in cells, for instance in the early  
 157 stages of filopodia. Our results therefore suggest that these phenomena can be a natural  
 158 result of membrane mediated interactions between microtubules.

159 Our system easily extends to vesicles that contain more than two microtubules, with  
 160 similar results. To illustrate this point, we plot the whole configuration space for the case  
 161 of three microtubules (Fig. 5) to look for the possible (semi) stable configurations. It turns  
 162 out that the global minimum of the resultant energy landscape is when all the microtubules  
 163 are attached to each other. There are, however, some local minima, all of which correspond  
 164 to the situation where two microtubules are bundled together and the other points to the  
 165 opposite pole of the vesicle.

## 166 Conclusion

167 Together with actin and intermediediate filaments, microtubules form an architecture that  
 168 governs the shape of a cell, and therefore that of the plasma membrane surrounding it. The



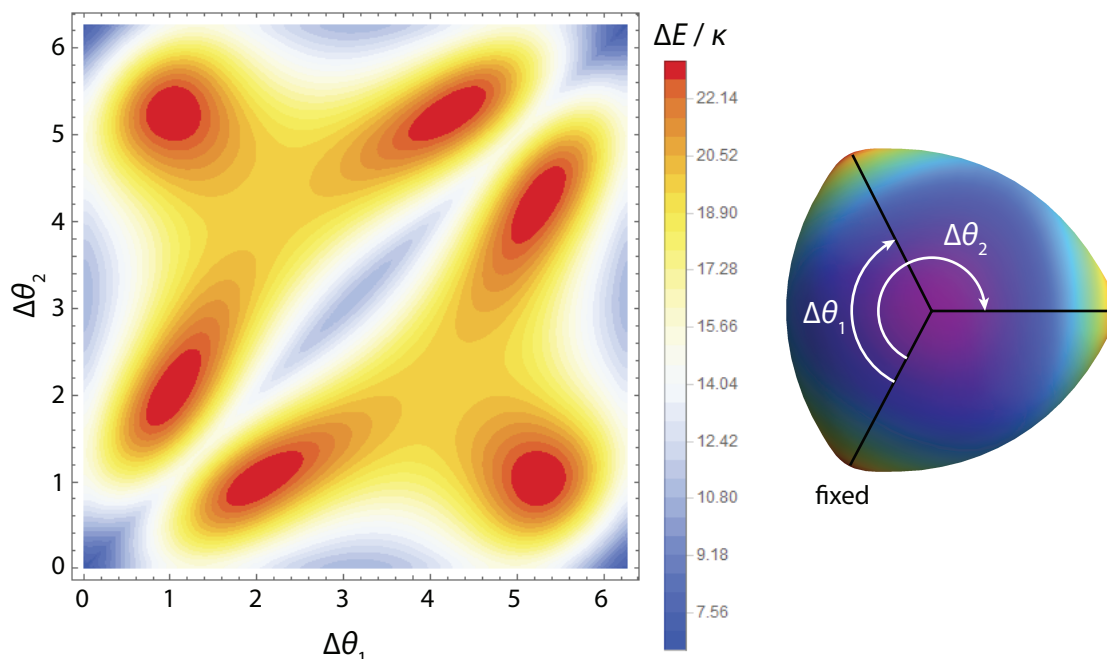

Figure 5: Plot of the configuration space of a vesicle with three enclosed microtubules, with the energy of each configuration shown in color. The closed shape of the vesicle favors the formation of parallel structures of microtubules. The global minimum of the energy corresponds to the situation where all the filaments are bundled, with local minima for the case of having two tubules together and one pointing in the opposite direction. Because filaments polymerize from the centrosome in opposite directions, the local minima may be biologically relevant.

169 membrane, in turn, mediates the interaction between attached microtubules. Using analyt-  
 170 ical tools, we studied the effect of membrane mediated interactions on the rearrangement of  
 171 microtubules. Our results suggest that the elastic properties of cellular membranes facili-  
 172 tate the bundling of microtubules. In particular, we showed that two vesicle-encapsulated  
 173 microtubules attract each other for small angular separations and repel for large angles. As  
 174 we explicitly demonstrated for three microtubules, the outcome of collective interactions be-  
 175 tween multiple filaments is microtubule coalescence, which may be harnessed for protrusion  
 176 formation (23). Our results reveal that force generating microtubules, when colliding with a  
 177 deformable obstacle like a fluid membrane, can coordinate their growing state through the  
 178 shape of distorted membrane between them. Putting all the results together, our study sug-  
 179 gests a possible mechanism underlying the preference of filaments for organizing in parallel  
 180 configurations (24).

## 181 Acknowledgments

182 This work was supported by the Netherlands Organisation for Scientific Research (NWO /  
183 OCW), as part of the Frontiers of Nanoscience program.

## 184 References

- 185 [1] Fletcher, D. A., and R. D. Mullins. 2010. Cell mechanics and the cytoskeleton. *Nature*.  
186 463:485.
- 187 [2] Revenu, C., R. Athman, S. Robine, and D. Louvard. 2004. The co-workers of actin  
188 filaments: from cell structures to signals. *Nature reviews. Molecular cell biology*. 5:635.
- 189 [3] Lodish, H., A. Berk, S. L. Zipursky, P. Matsudaira, D. Baltimore, and J. Darnell. 2000.  
190 The actin cytoskeleton. WH Freeman.
- 191 [4] Ridley, A. J. 2006. Rho gtpases and actin dynamics in membrane protrusions and vesicle  
192 trafficking. *Trends in Cell Biology*. 16:522–529.
- 193 [5] Le Clainche, C., and M.-F. Carrier. 2008. Regulation of actin assembly associated with  
194 protrusion and adhesion in cell migration. *Physiological Reviews*. 88:489–513.
- 195 [6] Fygenson, D. K., J. F. Marko, and A. Libchaber. 1997. Mechanics of microtubule-based  
196 membrane extension. *Physical Review Letters*. 79:4497.
- 197 [7] Emsellem, V., O. Cardoso, and P. Tabeling. 1998. Vesicle deformation by microtubules:  
198 a phase diagram. *Physical Review E*. 58:4807.
- 199 [8] Mesarec, L., W. Gózdź, S. Kralj, M. Fošnaric, S. Penič, V. Kralj-Iglič, and A. Iglič. 2017.  
200 On the role of external force of actin filaments in the formation of tubular protrusions of  
201 closed membrane shapes with anisotropic membrane components. *European Biophysics*  
202 *Journal*. 46:705–718.
- 203 [9] e Silva, M. S., J. Alvarado, J. Nguyen, N. Georgoulia, B. M. Mulder, and G. H. Koen-  
204 derink. 2011. Self-organized patterns of actin filaments in cell-sized confinement. *Soft*  
205 *Matter*. 7:10631–10641.
- 206 [10] Atilgan, E., D. Wirtz, and S. X. Sun. 2006. Mechanics and dynamics of actin-driven  
207 thin membrane protrusions. *Biophysical Journal*. 90:65–76.
- 208 [11] Kerssemakers, J. W., E. L. Munteanu, L. Laan, T. L. Noetzel, M. E. Janson, and  
209 M. Dogterom. 2006. Assembly dynamics of microtubules at molecular resolution. *Na-*  
210 *nature*. 442:709.
- 211 [12] Howard, J., and A. A. Hyman. 2003. Dynamics and mechanics of the microtubule plus  
212 end. *Nature*. 422:753.

- 213 [13] Liu, M., V. C. Nadar, F. Kozielski, M. Kozłowska, W. Yu, and P. W. Baas. 2010.  
214 Kinesin-12, a mitotic microtubule-associated motor protein, impacts axonal growth,  
215 navigation, and branching. *Journal of Neuroscience*. 30:14896–14906.
- 216 [14] Svitkina, T. M., E. A. Bulanova, O. Y. Chaga, D. M. Vignjevic, S. Kojima, J. M.  
217 Vasiliev, and G. G. Borisy. 2003. Mechanism of filopodia initiation by reorganization of  
218 a dendritic network. *J. Cell Biol.* 160:409–421.
- 219 [15] Conde, C., and A. Cáceres. 2009. Microtubule assembly, organization and dynamics in  
220 axons and dendrites. *Nature reviews. Neuroscience*. 10:319.
- 221 [16] Dommersnes, P. G., and J.-B. Fournier. 2002. The many-body problem for anisotropic  
222 membrane inclusions and the self-assembly of saddle defects into an egg carton. *Bio-*  
223 *physical Journal*. 83:2898–2905.
- 224 [17] Vahid, A., and T. Idema. 2016. Pointlike inclusion interactions in tubular membranes.  
225 *Physical Review Letters*. 117:138102.
- 226 [18] Evans, A., M. Turner, and P. Sens. 2003. Interactions between proteins bound to  
227 biomembranes. *Physical Review E*. 67:041907.
- 228 [19] Dai, J., and M. P. Sheetz. 1999. Membrane tether formation from blebbing cells. *Bio-*  
229 *physical Journal*. 77:3363–3370.
- 230 [20] Bowne-Anderson, H., M. Zanic, M. Kauer, and J. Howard. 2013. Microtubule dynamic  
231 instability: a new model with coupled gtp hydrolysis and multistep catastrophe. *Bioes-*  
232 *says*. 35:452–461.
- 233 [21] Dogterom, M., and B. Yurke. 1997. Measurement of the force-velocity relation for  
234 growing microtubules. *Science*. 278:856–860.
- 235 [22] Grishchuk, E. L., M. I. Molodtsov, F. I. Ataullakhanov, and J. R. McIntosh. 2005. Force  
236 production by disassembling microtubules. *Nature*. 438:384.
- 237 [23] Weichsel, J., and P. L. Geissler. 2016. The more the tubular: Dynamic bundling of actin  
238 filaments for membrane tube formation. *PLoS Computational Biology*. 12:e1004982.
- 239 [24] Liu, A. P., D. L. Richmond, L. Maibaum, S. Pronk, P. L. Geissler, and D. A. Fletcher.  
240 2008. Membrane-induced bundling of actin filaments. *Nature Physics*. 4:789.
